# Supplementary material for: Endothelial cells from pulmonary endarterectomy specimens possess a high angiogenic potential and express high levels of hepatocyte growth factor
Source: Springer Nature journal article supplement (doi:10.1186/s12890-018-0769-3), 2018-12-01

**A)**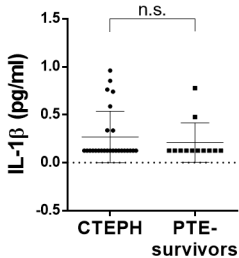**B)**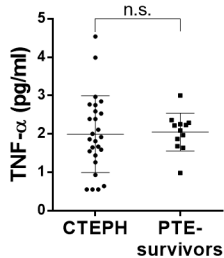**C)**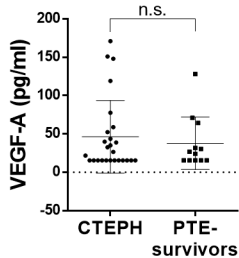**D)**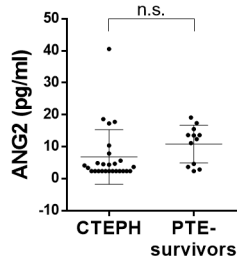

Supplement: MOESM2 [file 16362802]
